# Supplementary material
Source: publisher figshare collection journal article supplement (https://tandf.figshare.com/ndownloader/files/16841207)

Figure A1: Thoracic deflection contours at the upper and lower levels (top and bottom rows) for the oblique test without the airbag. Deformed contours are shown in blue and undeformed contours are shown in black color.

Figure A2: Thoracic deflection contours at the upper and lower levels (top and bottom rows) for the oblique test with the airbag. Deformed contours are shown in blue and undeformed contours are shown in black color.

Figure A3: Thoracic deflection contours at the upper and lower levels (top and bottom rows) for the pure lateral test without the airbag. Deformed contours are shown in blue and undeformed contours are shown in black color.

Figure A4: Thoracic deflection contours at the upper and lower levels (top and bottom rows) for the pure lateral test with the airbag. Deformed contours are shown in blue and undeformed contours are shown in black color.

Figure A5: Sled pulse

Table A1: Test Matrix

| ID | Impact type | Airbag |
| --- | --- | --- |
| 1 | Oblique | No |
| 2 | Oblique | Yes |
| 3 | Oblique | No |
| 4 | Oblique | Yes |
| 5 | Pure lateral | No |
| 6 | Pure lateral | Yes |

Figure A1


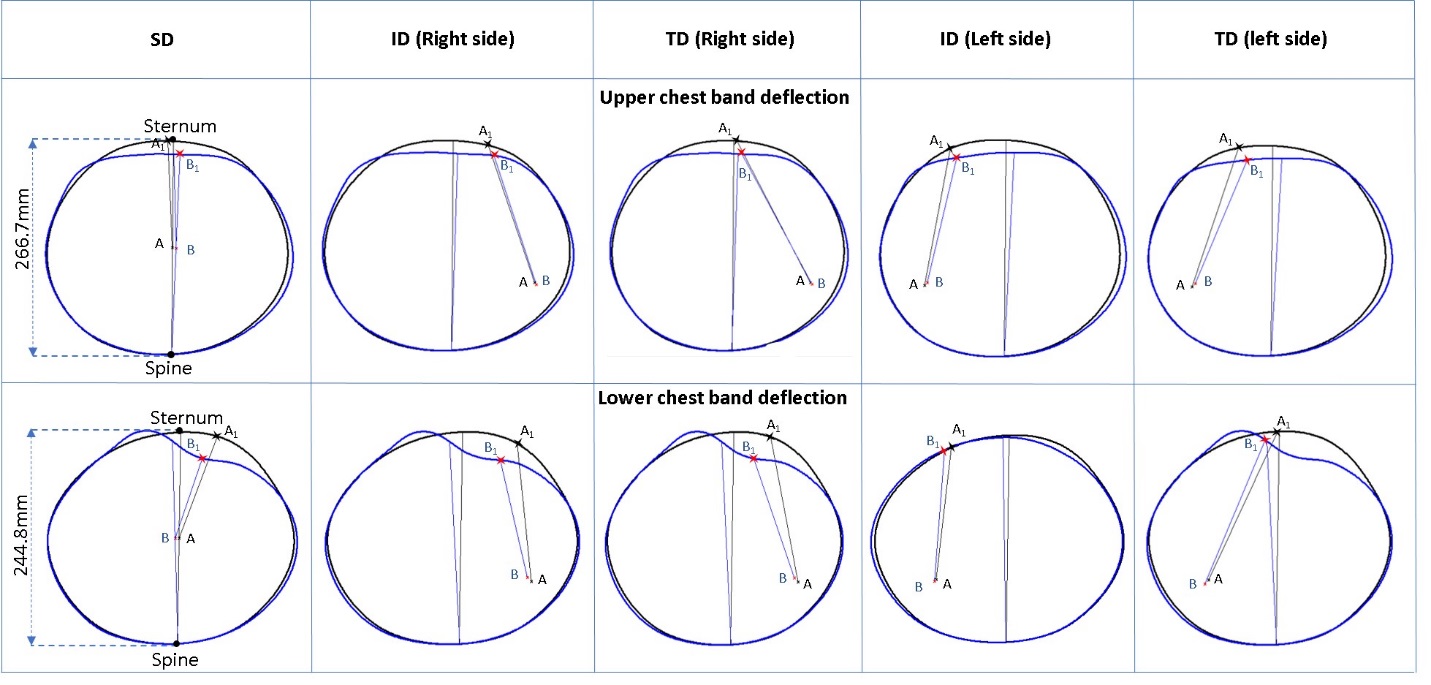


Figure A2


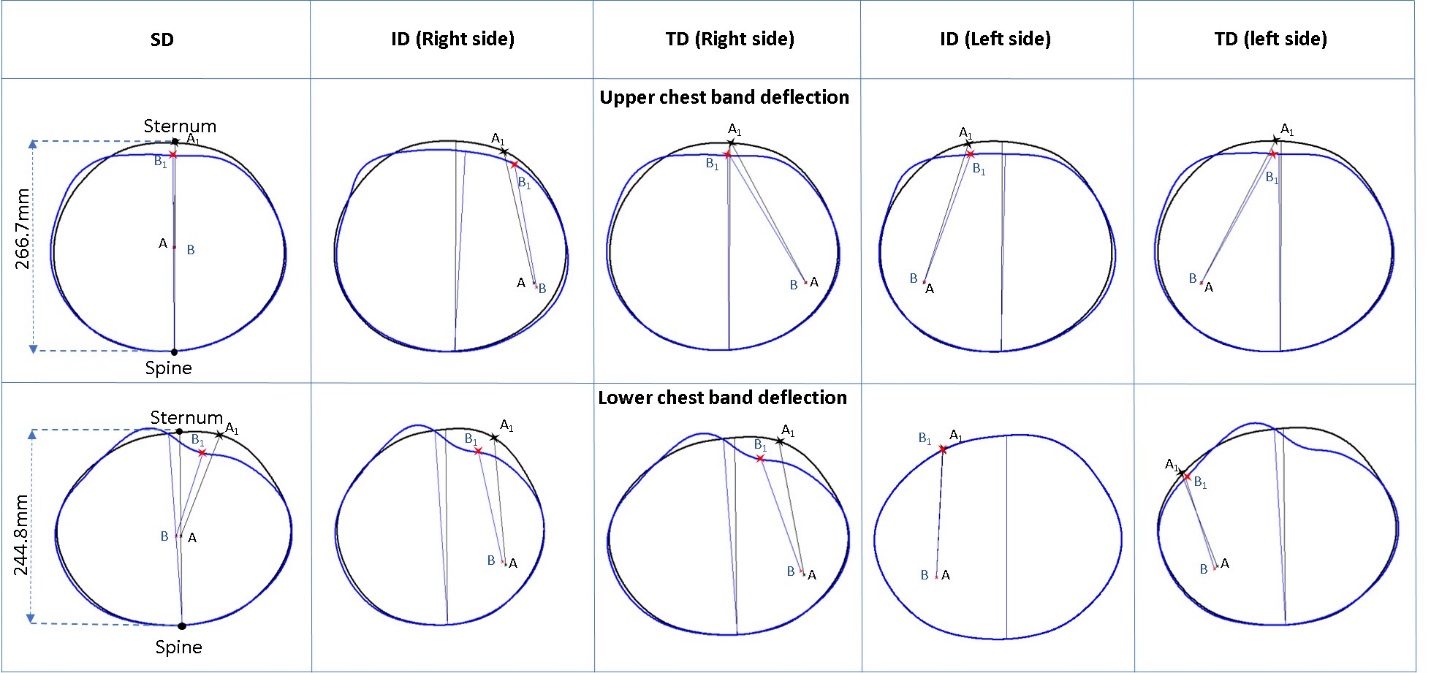


Figure A3


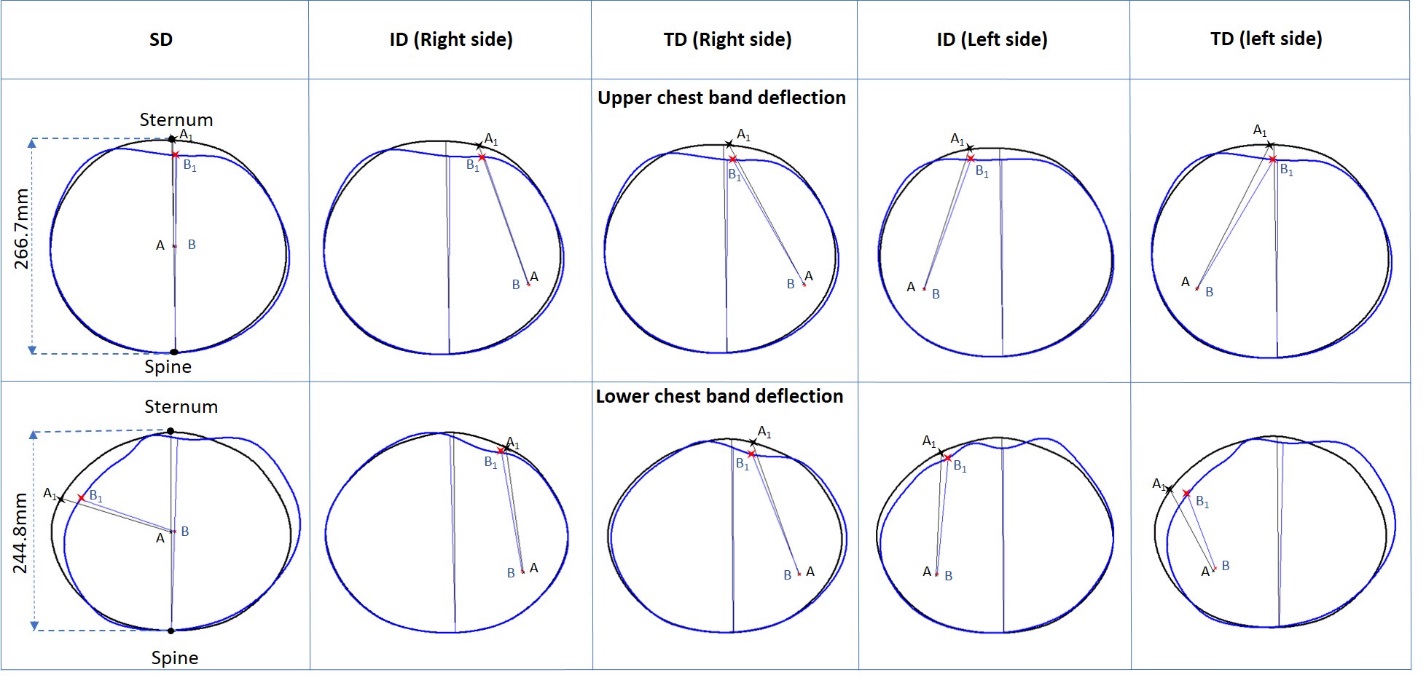


Figure A4


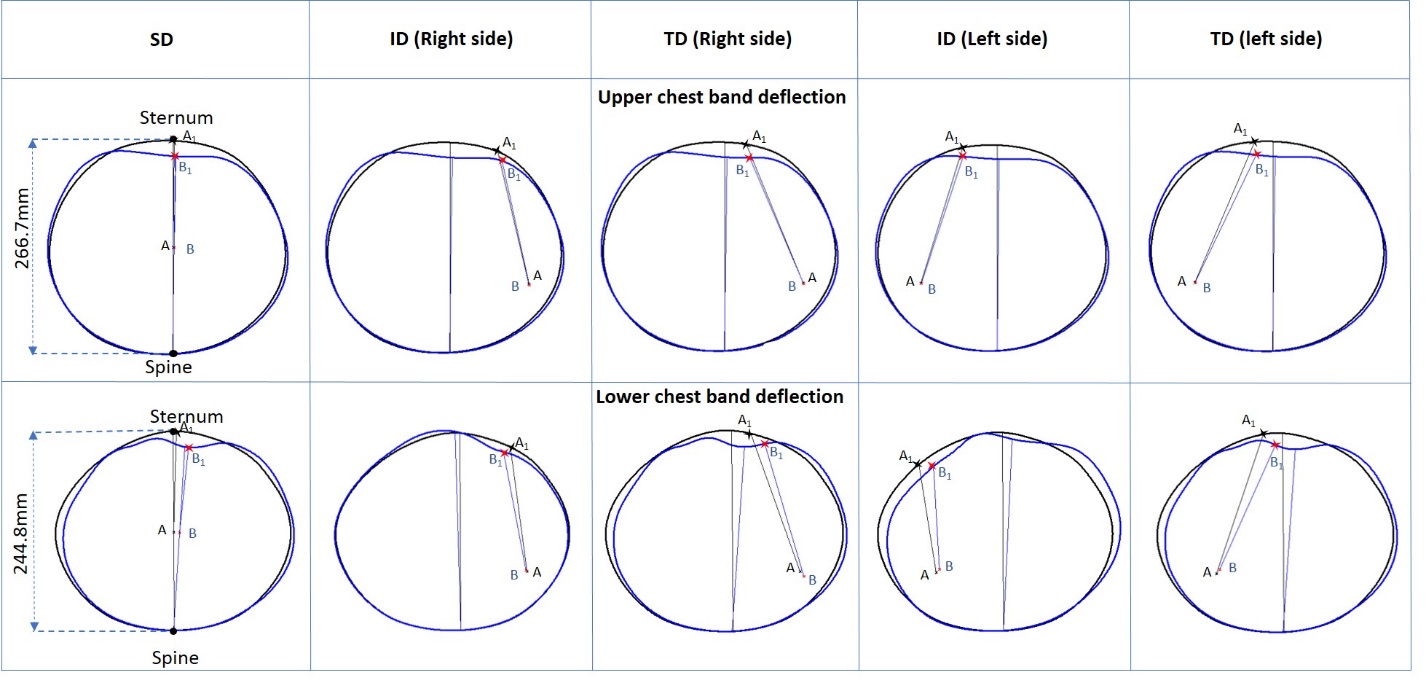


Figure A5


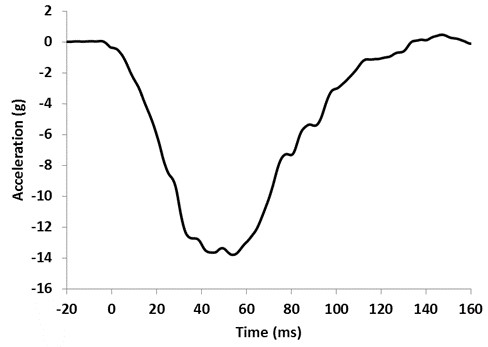

Supplement: Supplementary file 1 [file 16841207]
